# Supplementary material
Source: publisher figshare collection journal article supplement (https://tandf.figshare.com/ndownloader/files/22864382)

**Supplemental material**

**Supplemental Table.** Statistical analysis of neuropsychological tests applied at both t0 and t1, comparing the two groups “cognitively changed” and “cognitively unchanged”.

| Neuropsychological test | p-value | η2G |
| --- | --- | --- |
| Mini Mental State Examination (MMSE) | n.s. |  |
| Raven’s Progressive Colored Matrices | 0.006 | 0.08 |
| Frontal Assessment Battery (FAB) | 0.0007 | 0.18 |
| Trail Making Test A | n.s. |  |
| Trail Making Test B | 0.0005 | 0.21 |
| Trail Making Test B-A | 0.0006 | 0.21 |
| Clock Drawing Test | 0.03 | 0.07 |
| Verbal Fluency | 0.0041 | 0.12 |
| Digit Span test (Forward) | n.s. |  |
| Digit Span test (Backward) | n.s. |  |
| Att. Matrix | n.s. |  |
| Cognitive Estimates Test | n.s. |  |
| Short Story Test | n.s. |  |
| Edinburgh Cognitive and Behavioural ALS Screen (ECAS) | n.s. |  |
| Neuropsychiatric Inventory (NPI) | 0.0002 | 0.16 |
| Frontal Systems Behaviour Scale (FrSBe) | n.s. |  |

**Supplemental Figure**. FAB, TMT, and NPI scores at both t0 and t1, comparing the two groups “cognitively changed” and “cognitively unchanged


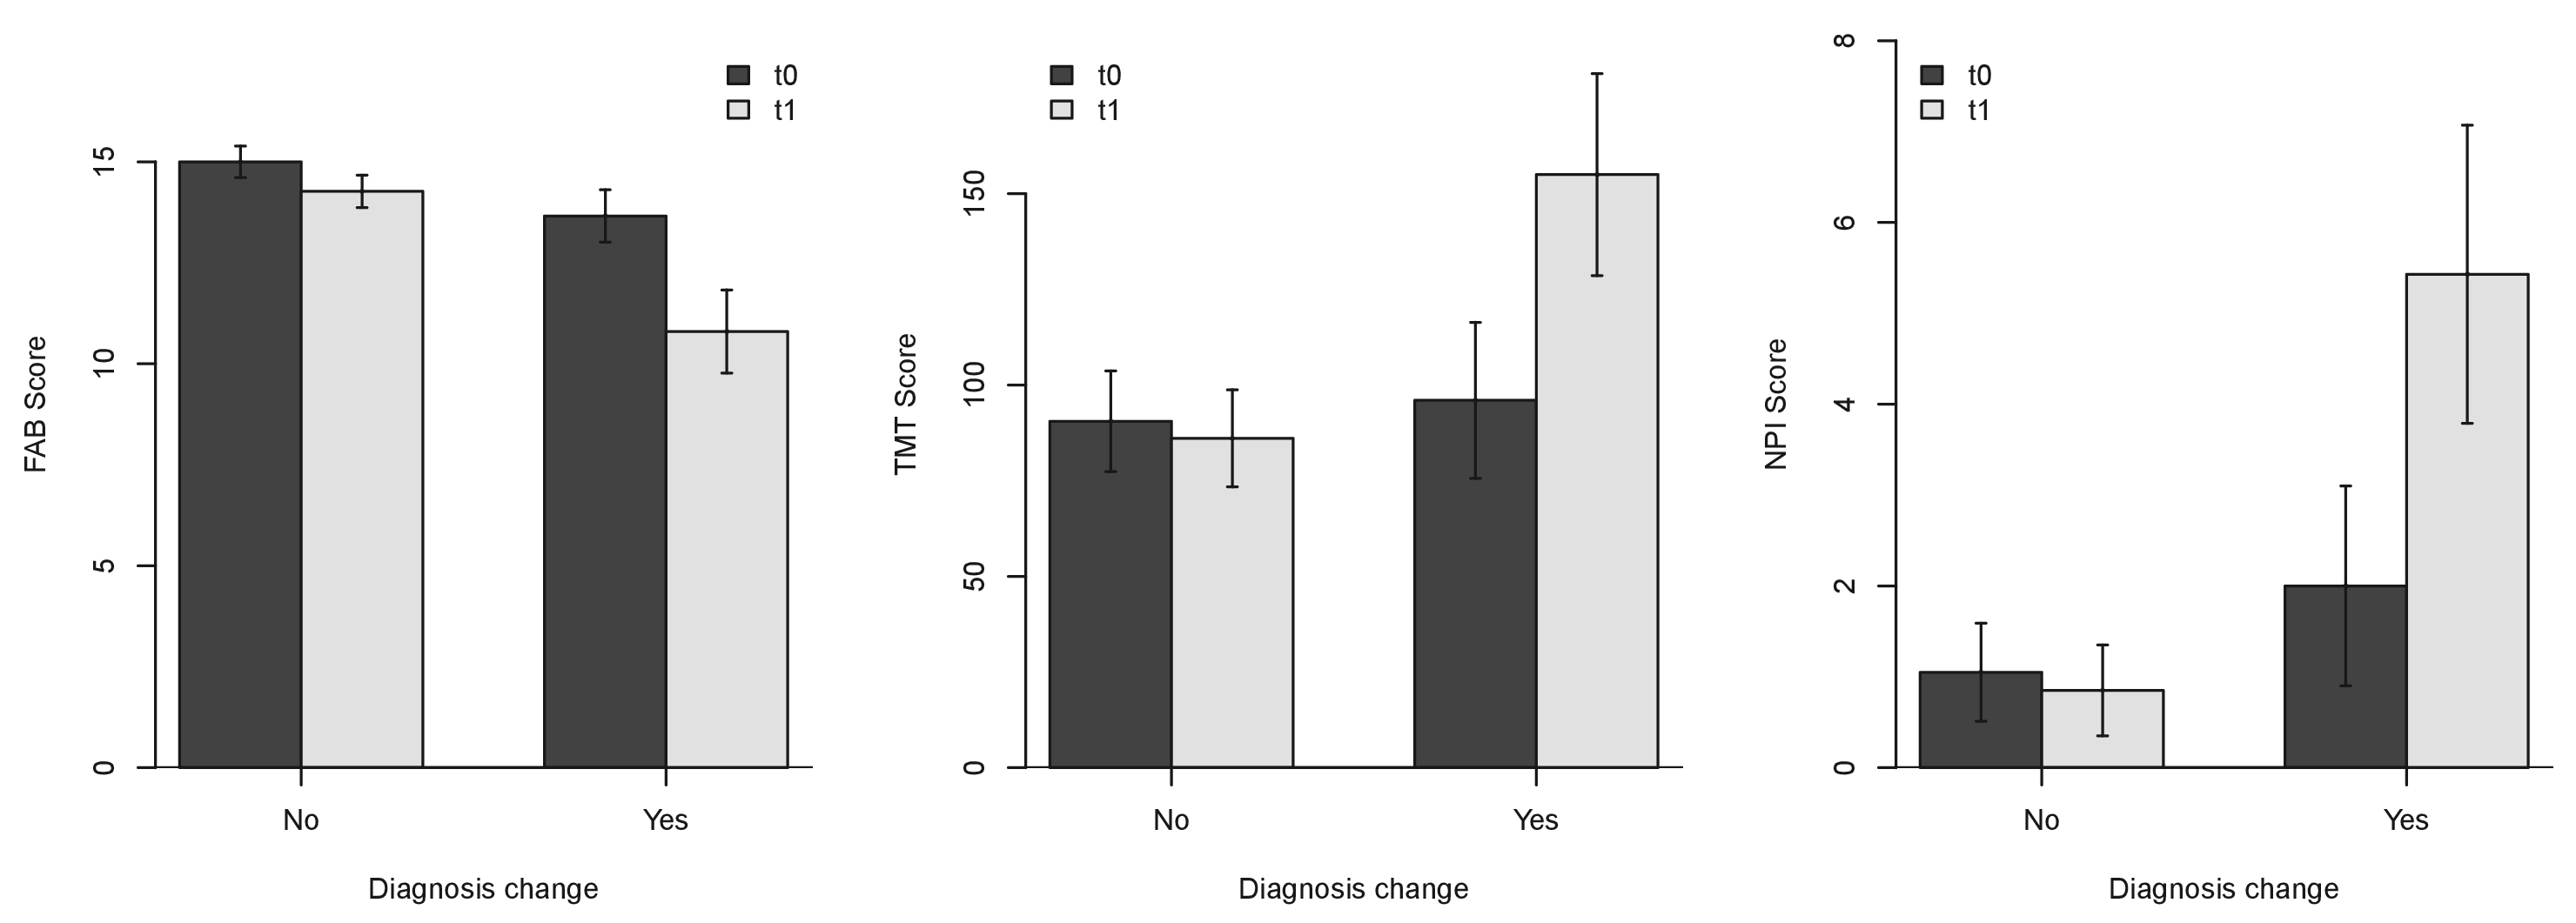

Supplement: Supplementary file 1 [file 22864382]
